# Supplementary material for: Comparison of the structural, electrochemical, and spectroscopic properties of two cryptates of trivalent uranium
Source: PubMed Central journal article supplement (PMC11106807; doi:10.1039/d4dt00521j), 2024-05-02
Supplement: DT-053-D4DT00521J-s001.pdf [file DT-053-D4DT00521J-s001.pdf]

## Comparison of the structural, electrochemical, and spectroscopic properties of two cryptates of trivalent uranium

D. Nuwangi Kulasekara,<sup>a</sup> Matthew D. Bailey,<sup>a</sup> Cassandra L. Ward,<sup>b</sup> and Matthew J. Allen\*,<sup>a</sup>

<sup>a</sup>Department of Chemistry, Wayne State University, 5101 Cass Avenue, Detroit, Michigan 48202, United States

<sup>b</sup>Lumigen Instrument Center, Wayne State University, 5101 Cass Avenue, Detroit, Michigan 48202, United States

\*Email: mallen@chem.wayne.edu

| Page | Contents                           |
|------|------------------------------------|
| S1   | Table of contents                  |
| S2   | Crystallographic data              |
| S5   | <i>SHAPE</i> analysis              |
| S7   | Cyclic voltammetry                 |
| S8   | Electronic absorption spectroscopy |

**Crystallographic data****Table S1.** Crystallographic properties of [U<sup>III</sup>1(DMF)<sub>2</sub>]<sub>3</sub>I<sub>3</sub>

|                              |                                                                                   |                 |
|------------------------------|-----------------------------------------------------------------------------------|-----------------|
| Chemical formula             | C <sub>24</sub> H <sub>50.01</sub> I <sub>3</sub> N <sub>4</sub> O <sub>8</sub> U |                 |
| Formula weight               | 1141.44                                                                           |                 |
| R <sub>1</sub>               | 0.0367                                                                            |                 |
| wR <sub>2</sub>              | 0.0900                                                                            |                 |
| Goodness of Fit              | 1.202                                                                             |                 |
| Largest residual peak/hole   | 0.96/−1.78                                                                        |                 |
| Temperature                  | 100 K                                                                             |                 |
| Wavelength                   | 0.71073 Å                                                                         |                 |
| Crystal system               | monoclinic                                                                        |                 |
| Space group                  | <i>P</i> 2 <sub>1</sub> / <i>c</i>                                                |                 |
| Unit cell dimensions         | a = 18.8644(12) Å                                                                 | α = 90°         |
|                              | b = 10.3453 Å                                                                     | β = 104.769(2)° |
|                              | c = 18.2109(10) Å                                                                 | γ = 90°         |
| Volume                       | 3436.6(4) Å <sup>3</sup>                                                          |                 |
| Z                            | 4                                                                                 |                 |
| Density (calculated)         | 2.206 g cm <sup>−3</sup>                                                          |                 |
| Absorption coefficient       | 7.465 mm <sup>−1</sup>                                                            |                 |
| F(000)                       | 2148.0                                                                            |                 |
| 2θ range for data collection | 4.466 to 53.46                                                                    |                 |
| Reflections collected        | 134878                                                                            |                 |
| Data/restraints/parameters   | 7296/1818/764                                                                     |                 |
| Independent reflections      | 7296                                                                              |                 |
| R <sub>int</sub>             | 0.0938                                                                            |                 |
| Crystal size                 | 0.626 mm × 0.385 mm × 0.235 mm                                                    |                 |
| CCDC no.                     | 2248987                                                                           |                 |

**Table S2.** Crystallographic properties of  $[\text{U}^{\text{III}}\text{2}(\text{DMF})_2]\text{I}_3$ 

|                                      |                                                                    |                     |
|--------------------------------------|--------------------------------------------------------------------|---------------------|
| Chemical formula                     | $\text{C}_{22}\text{H}_{46}\text{I}_3\text{N}_4\text{O}_7\text{U}$ |                     |
| Formula weight                       | 1097.36                                                            |                     |
| $R_1$                                | 0.0252                                                             |                     |
| $wR_2$                               | 0.0668                                                             |                     |
| Goodness of Fit                      | 1.031                                                              |                     |
| Largest residual peak/hole           | 1.83/−1.32                                                         |                     |
| Temperature                          | 100.00 K                                                           |                     |
| Wavelength                           | 0.71073 Å                                                          |                     |
| Crystal system                       | orthorhombic                                                       |                     |
| Space group                          | <i>Ibca</i>                                                        |                     |
| Unit cell dimensions                 | $a = 14.2159(5)$ Å                                                 | $\alpha = 90^\circ$ |
|                                      | $b = 14.8269(5)$ Å                                                 | $\beta = 90^\circ$  |
|                                      | $c = 31.2033(11)$ Å                                                | $\gamma = 90^\circ$ |
| Volume                               | $6577.0(4)$ Å <sup>3</sup>                                         |                     |
| Z                                    | 8                                                                  |                     |
| Density (calculated)                 | $2.216$ g cm <sup>−3</sup>                                         |                     |
| Absorption coefficient               | $7.794$ mm <sup>−1</sup>                                           |                     |
| F(000)                               | 4104.0                                                             |                     |
| 2 $\theta$ range for data collection | 4.752 to 52.04                                                     |                     |
| Reflections collected                | 38026                                                              |                     |
| Data/restraints/parameters           | 3240/0/172                                                         |                     |
| Independent reflections              | 3240                                                               |                     |
| $R_{\text{int}}$                     | 0.0474                                                             |                     |
| Crystal size                         | 0.06 mm × 0.06 mm × 0.06 mm                                        |                     |
| CCDC no.                             | 2248985                                                            |                     |

**Table S3.** Crystallographic properties of [U<sup>III</sup>2(CH<sub>3</sub>CN)<sub>2</sub>]<sub>3</sub>I<sub>3</sub>

|                              |                                                                                |         |
|------------------------------|--------------------------------------------------------------------------------|---------|
| Chemical formula             | C <sub>20</sub> H <sub>38</sub> I <sub>3</sub> N <sub>4</sub> O <sub>5</sub> U |         |
| Formula weight               | 1033.27                                                                        |         |
| R <sub>1</sub>               | 0.0254                                                                         |         |
| wR <sub>2</sub>              | 0.0635                                                                         |         |
| Goodness of Fit              | 1.030                                                                          |         |
| Largest residual peak/hole   | 1.93/−1.13                                                                     |         |
| Temperature                  | 100 K                                                                          |         |
| Wavelength                   | 0.71073 Å                                                                      |         |
| Crystal system               | Orthorhombic                                                                   |         |
| Space group                  | <i>Ibca</i>                                                                    |         |
| Unit cell dimensions         | a = 13.9235(4) Å                                                               | α = 90° |
|                              | b = 14.4448(3) Å                                                               | β = 90° |
|                              | c = 30.0718(9) Å                                                               | γ = 90° |
| Volume                       | 6048.1(3) Å <sup>3</sup>                                                       |         |
| Z                            | 8                                                                              |         |
| Density (calculated)         | 2.270 g cm <sup>−3</sup>                                                       |         |
| Absorption coefficient       | 8.463 mm <sup>−1</sup>                                                         |         |
| F(000)                       | 3816.0                                                                         |         |
| 2θ range for data collection | 4.884 to 53.45                                                                 |         |
| Reflections collected        | 37598                                                                          |         |
| Data/restraints/parameters   | 3215/90/168                                                                    |         |
| Independent reflections      | 3215                                                                           |         |
| R <sub>int</sub>             | 0.0536                                                                         |         |
| Crystal size                 | 0.1 mm × 0.04 mm × 0.04 mm                                                     |         |
| CCDC no.                     | 2248986                                                                        |         |

**SHAPE Analysis****Table S4:**  $[\text{U}^{\text{III}}\text{1}(\text{DMF})_2]\text{I}_3$ 

| Shape                                   | Shape code | Point group | CShM     |
|-----------------------------------------|------------|-------------|----------|
| Decagon                                 | DP-10      | $D_{10h}$   | 35.34052 |
| Enneagonal pyramid                      | EPY-10     | $C_{9v}$    | 23.49005 |
| Octagonal bipyramid                     | OBPY-10    | $D_{8h}$    | 18.64698 |
| Pentagonal prism                        | PPR-10     | $D_{5h}$    | 11.88054 |
| Pentagonal antiprism                    | PAPR-10    | $D_{5d}$    | 9.77952  |
| Bicapped cube J15                       | JBCCU-10   | $D_{4h}$    | 14.23529 |
| Bicapped square antiprism J17           | JBCSAPR-10 | $D_{4d}$    | 5.46596  |
| Metabidiminished icosahedron J62        | JMBIC-10   | $C_{2v}$    | 5.65646  |
| Augmented tridiminished icosahedron J64 | JATDI-10   | $C_{3v}$    | 16.64308 |
| Sphenocorona J87                        | JSPC-10    | $C_{2v}$    | 4.65835  |
| Staggered Dodecahedron (2:6:2)          | SDD-10     | $D_2$       | 5.79346  |
| Tetradecahedron (2:6:2)                 | TD-10      | $C_{2v}$    | 6.23016  |
| Hexadecahedron (2:6:2) or (1:4:4:1)     | HD-10      | $D_{4h}$    | 11.90867 |

**Table S5:**  $[\text{U}^{\text{III}}\text{2}(\text{CH}_3\text{CN})_2]\text{I}_3$ 

| Shape                              | Shape code | Point group | CShM     |
|------------------------------------|------------|-------------|----------|
| Enneagon                           | EP-9       | $D_{9h}$    | 34.74782 |
| Octagonal pyramid                  | OPY-9      | $C_{8v}$    | 25.74663 |
| Heptagonal bipyramid               | HBPY-9     | $D_{7h}$    | 12.60957 |
| Johnson triangular cupola J3       | JTC-9      | $C_{3v}$    | 17.15297 |
| Capped cube J8                     | JCCU-9     | $C_{4v}$    | 4.64799  |
| Spherical-relaxed capped cube      | CCU-9      | $C_{4v}$    | 3.39415  |
| Capped square antiprism J10        | JCSAPR-9   | $C_{4v}$    | 9.23594  |
| Spherical capped square antiprism  | CSAPR-9    | $C_{4v}$    | 7.98444  |
| Tricapped trigonal prism J51       | JTCTPR-9   | $D_{3h}$    | 9.78317  |
| Spherical tricapped trigonal prism | TCTPR-9    | $D_{3h}$    | 9.09181  |
| Tridiminished icosahedron J63      | JTDIC-9    | $C_{3v}$    | 12.72477 |
| Hula-hoop                          | HH-9       | $C_{2v}$    | 4.68641  |
| Muffin                             | MFF-9      | $C_s$       | 5.99667  |

**Table S6:**  $[\text{U}^{\text{III}}_2(\text{DMF})_2]\text{I}_3$ 

| Shape                              | Shape code | Point group | CShM     |
|------------------------------------|------------|-------------|----------|
| Enneagon                           | EP-9       | $D_{9h}$    | 34.48255 |
| Octagonal pyramid                  | OPY-9      | $C_{8v}$    | 24.41299 |
| Heptagonal bipyramid               | HBPY-9     | $D_{7h}$    | 13.21402 |
| Johnson triangular cupola J3       | JTC-9      | $C_{3v}$    | 16.86874 |
| Capped cube J8                     | JCCU-9     | $C_{4v}$    | 4.98985  |
| Spherical-relaxed capped cube      | CCU-9      | $C_{4v}$    | 3.81427  |
| Capped square antiprism J10        | JCSAPR-9   | $C_{4v}$    | 7.83377  |
| Spherical capped square antiprism  | CSAPR-9    | $C_{4v}$    | 6.81463  |
| Tricapped trigonal prism J51       | JTCTPR-9   | $D_{3h}$    | 8.49939  |
| Spherical tricapped trigonal prism | TCTPR-9    | $D_{3h}$    | 7.73924  |
| Tridiminished icosahedron J63      | JTDIC-9    | $C_{3v}$    | 12.14417 |
| Hula-hoop                          | HH-9       | $C_{2v}$    | 4.85224  |
| Muffin                             | MFF-9      | $C_s$       | 4.97180  |

**Table S7:**  $[\text{U}^{\text{III}}_1(\text{I})(\text{CH}_3\text{CN})]\text{I}_2^*$ 

| Shape                                   | Shape code | Point group | CShM     |
|-----------------------------------------|------------|-------------|----------|
| Decagon                                 | DP-10      | $D_{10h}$   | 36.41763 |
| Enneagonal pyramid                      | EPY-10     | $C_{9v}$    | 24.33195 |
| Octagonal bipyramid                     | OBPY-10    | $D_{8h}$    | 19.59560 |
| Pentagonal prism                        | PPR-10     | $D_{5h}$    | 13.24703 |
| Pentagonal antiprism                    | PAPR-10    | $D_{5d}$    | 10.31513 |
| Bicapped cube J15                       | JBCCU-10   | $D_{4h}$    | 15.54988 |
| Bicapped square antiprism J17           | JBCSAPR-10 | $D_{4d}$    | 9.08357  |
| Metabidiminished icosahedron J62        | JMBIC-10   | $C_{2v}$    | 9.10878  |
| Augmented tridiminished icosahedron J64 | JATDI-10   | $C_{3v}$    | 18.27942 |
| Sphenocorona J87                        | JSPC-10    | $C_{2v}$    | 7.95305  |
| Staggered Dodecahedron (2:6:2)          | SDD-10     | $D_2$       | 8.41509  |
| Tetradecahedron (2:6:2)                 | TD-10      | $C_{2v}$    | 9.15793  |
| Hexadecahedron (2:6:2) or (1:4:4:1)     | HD-10      | $D_{4h}$    | 13.32313 |

\* D. N. Huh, J. M. Barlow, S. R. Ciccone, J. W. Ziller, J. Y. Yang and W. J. Evans, *Inorg. Chem.*, 2020, **59**, 17077–17083.

## Cyclic voltammetry

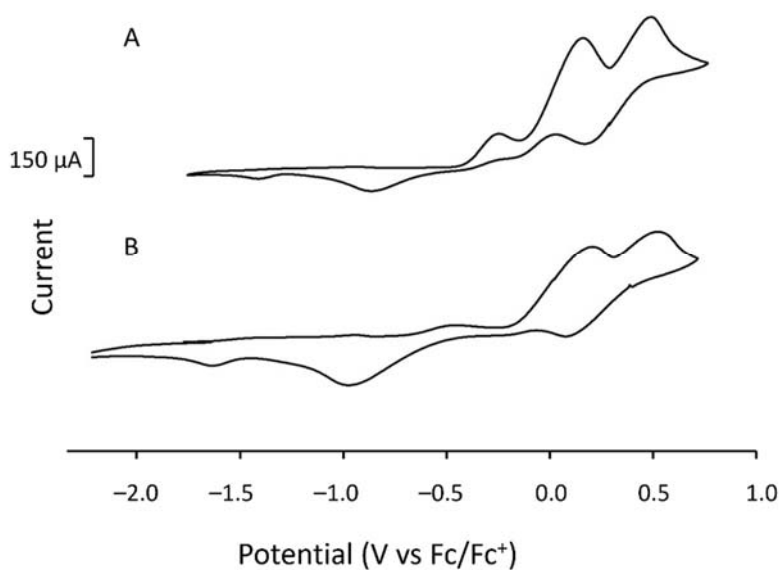

**Figure S1.** Cyclic voltammogram of (A) [U<sup>III</sup>1]I<sub>3</sub> and (B) [U<sup>III</sup>2]I<sub>3</sub> in CH<sub>3</sub>CN [scan rate = 300 mV s<sup>-1</sup>, and initial potential = -1.0 and -1.5 (V vs Ag/AgCl) for (A) and (B), respectively].

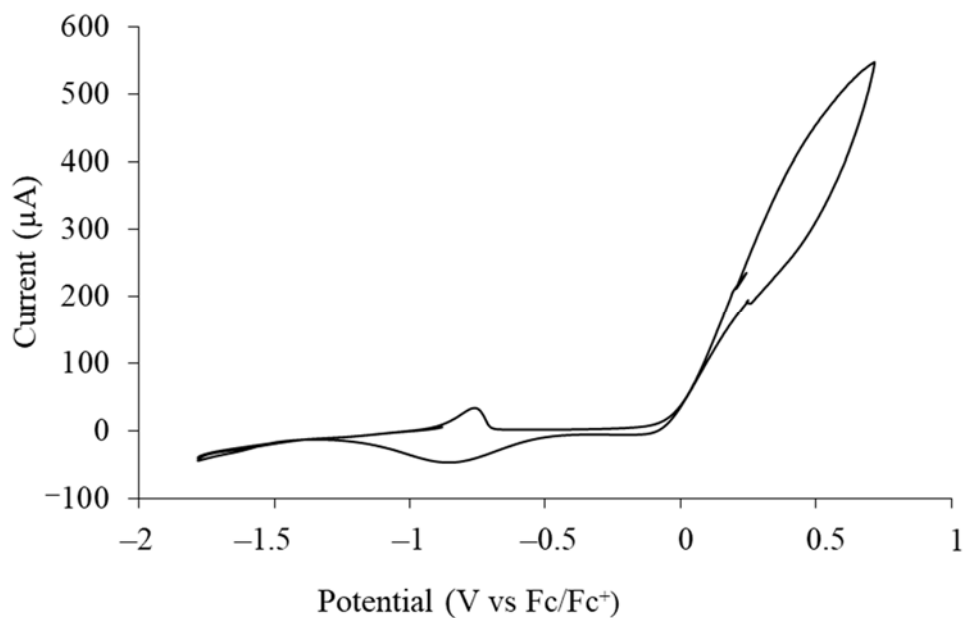

**Figure S2.** Cyclic voltammogram of UI<sub>3</sub>(1,4-dioxane)<sub>1.5</sub> in acetonitrile [scan rate = 100 mV s<sup>-1</sup>, and initial potential = -1.0 (V vs Ag/AgCl)].

**Electronic absorption spectroscopy**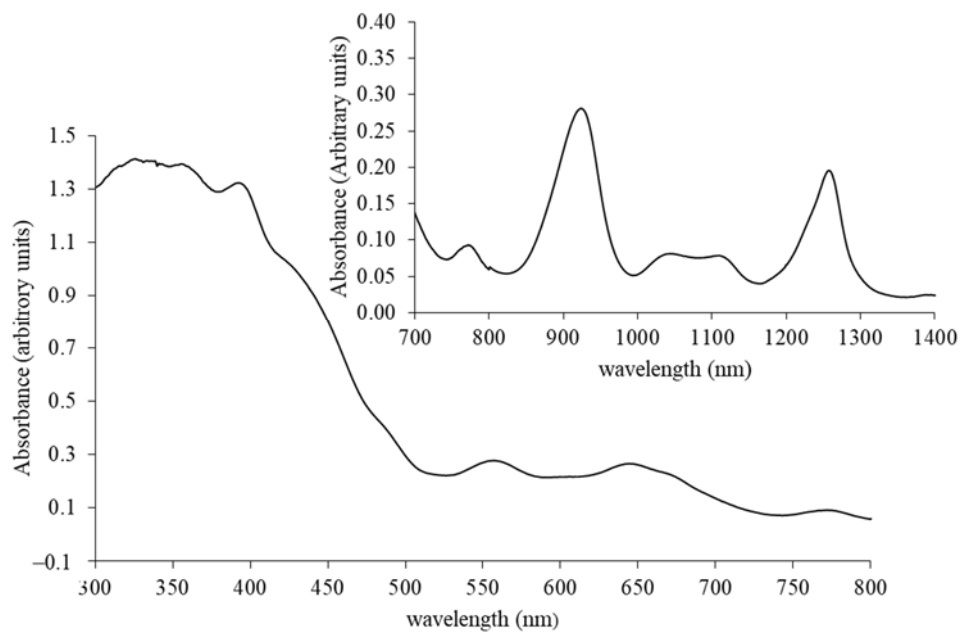**Figure S3.** Electronic absorption spectra for  $\text{UI}_3(1,4\text{-dioxane})_{1.5}$  in acetonitrile
